# Supplementary material for: Hepatocyte-specific loss of GPS2 in mice reduces non-alcoholic steatohepatitis via activation of PPARα
Source: PubMed Central journal article supplement (PMC6459876; doi:10.1038/s41467-019-09524-z), 2019-04-11
Supplement: 41467_2019_9524_MOESM1_ESM.pdf [file 41467_2019_9524_MOESM1_ESM.pdf]

**Hepatocyte-specific loss of GPS2 in mice reduces non-alcoholic steatohepatitis via activation of PPAR $\alpha$ .**

Liang et al.

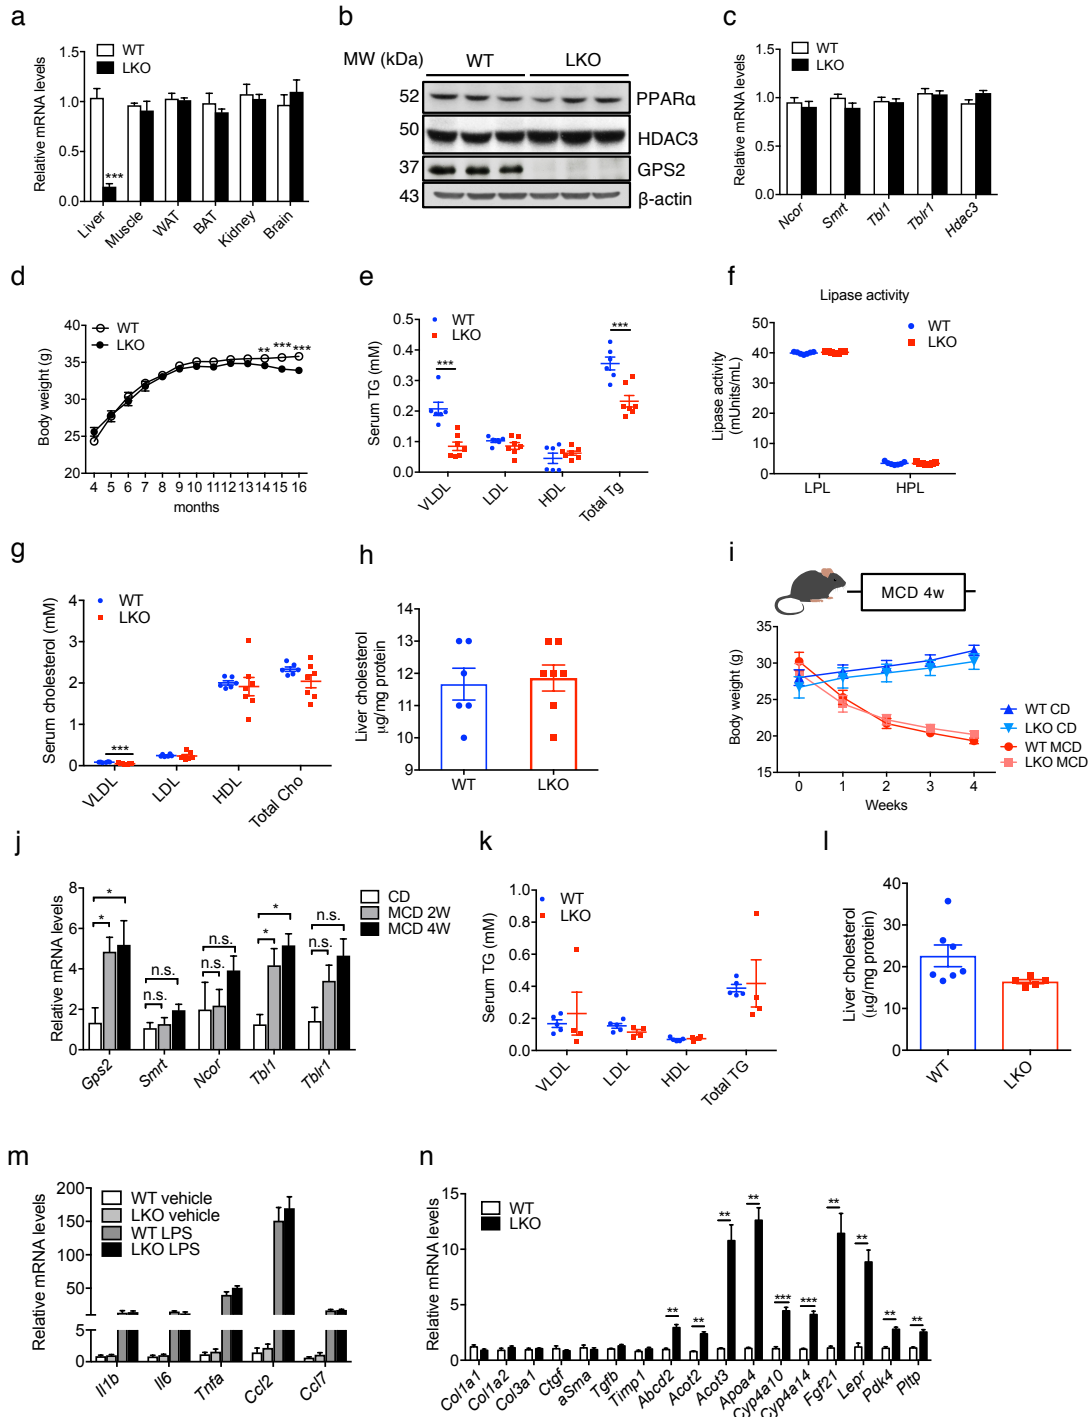

**Supplementary Figure 1: Phenotyping of *Gps2* LKO mice.**

(a) QPCR analysis of *Gps2* expression in different organs in CD fed WT and LKO mice, n = 3, non-parametric Mann-Whitney test. (b) Western blot analysis of PPAR $\alpha$ , HDAC3 and GPS2 in WT and LKO mice,  $\beta$ -actin was used as an internal control. (c) QPCR analysis of corepressor complex components in CD fed WT and LKO mice, n = 3, non-parametric Mann-Whitney test. (d) Body weight change in CD fed mice, WT n = 6-12, LKO n = 6-11, non-parametric Mann-Whitney test; (e) serum lipoprotein, WT n = 6, LKO n = 7, non-parametric Mann-Whitney test; and (f) plasma lipase activity, n = 7, non-parametric Mann-Whitney test; (g) serum and (h) liver cholesterol in 6 hour fasted WT and LKO mice, WT n = 6 and LKO n = 7, non-parametric Mann-Whitney test. (i) Body weight change of MCD fed mice, n = 4 in CD and n = 10-12 in MCD groups. (j) QPCR analysis of corepressor complex component expression in different time points of MCD fed mice, n = 3 in CD, n = 6 in 2 weeks of MCD and n = 4 in 4 weeks of MCD, one-way ANOVA followed by Tukey's test. (k) Serum and (l) liver cholesterol in 6 hour fasted WT and LKO mice after 4 weeks of MCD, WT n = 5 and LKO n = 4, non-parametric Mann-Whitney test. (m-n) QPCR analysis of mice liver mRNA expression in (l) LPS treatment; or (m) basal condition, vehicle n = 5 and LPS n = 4, non-parametric Mann-Whitney test. All data are represented as mean  $\pm$  s.e.m. \*P < 0.05, \*\*P < 0.01, \*\*\*P < 0.001.

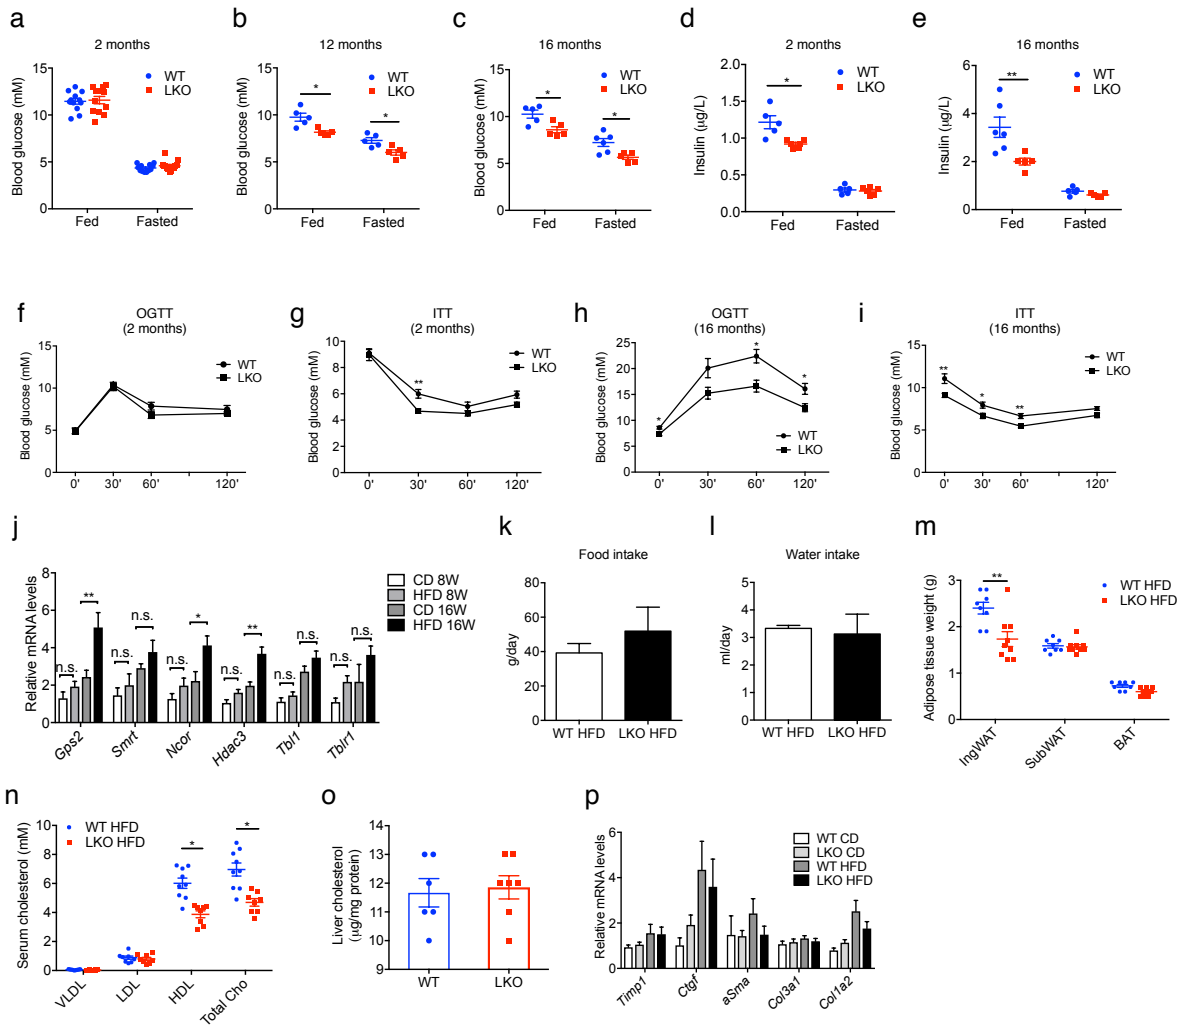

**Supplementary Figure 2: Phenotyping of *Gps2* LKO mice.**

(a-e) Fed and 12 hour fasted blood glucose in (a) 2 months old, n = 12 (b) 12 months old, n = 5; and (c) 16 months old mice, n = 5-6. (d-e) Fed and 12 hour fasted insulin in (d) 2 months old, WT n = 5 and LKO n = 6; and (e) 16 months old mice, WT n = 6 and LKO n = 5. (f-i) (f) OGTT, n = 6; and (g) ITT in 2 months old mice, n = 5. (h-i) (h) OGTT and (i) ITT in 16 months old mice, non-parametric Mann-Whitney test. (j) QPCR analysis of corepressor complex components in 8 weeks and 16 weeks of CD or HFD fed mice, n = 5 in each group, one-way ANOVA followed by Tukey's test. (k-l) (k) Food and (l) water uptake of the mice after 12 weeks of HFD feeding, n = 9. (m) Adipose tissue weight in HFD fed mice, WT n = 8 and LKO n = 9. (n) 6 hour fasted serum lipoprotein cholesterol profiles and (o) liver cholesterol in WT and LKO mice after 12 weeks of HFD, WT n = 6 and LKO n = 7, non-parametric Mann-Whitney test. (p) QPCR analysis of fibrotic genes in CD and HFD fed WT and LKO mice, n = 5, one-way ANOVA followed by Tukey's test. All data are represented as mean  $\pm$  s.e.m. \*P < 0.05, \*\*P < 0.01, \*\*\*P < 0.001.

a

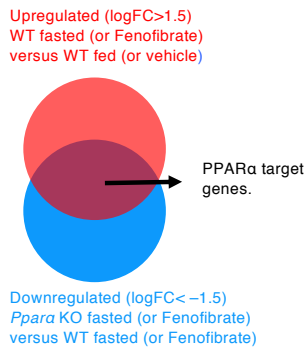

b

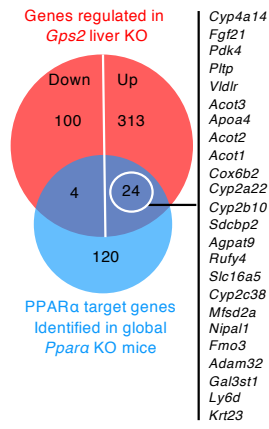

c

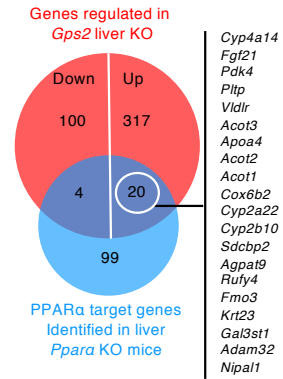

d

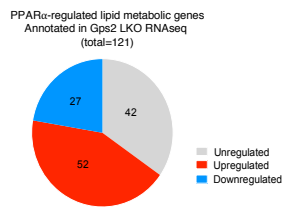

e

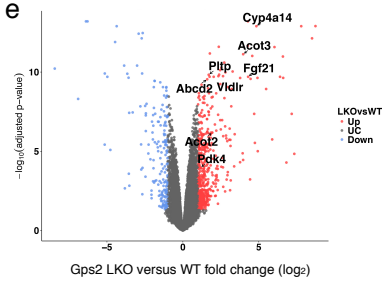

f

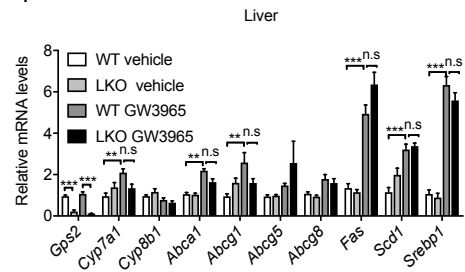

**Supplementary Figure 3: GPS2 interplays with PPAR $\alpha$  in mice liver.**

(a) Flowchart representing the comparative analysis of transcriptomic data using different datasets. (b-c) Comparative analysis of *Gps2* LKO and (b) *Ppara* KO and (c) *Ppara* liver-specific KO transcriptomes. (d) Pie chart representing the percentage of GPS2 regulated genes among the 121 PPAR $\alpha$  target metabolic genes. (e) Volcano plot of the global mRNA expression in LKO liver. (f) QPCR analysis of WT and LKO livers in vehicle and GW3965 (LXR agonist) treated mice, vehicle n = 3-7, GW3965 n = 6, one-way ANOVA followed by Tukey's test. All data are represented as mean  $\pm$  s.e.m. \*P < 0.05, \*\*P < 0.01, \*\*\*P < 0.001.

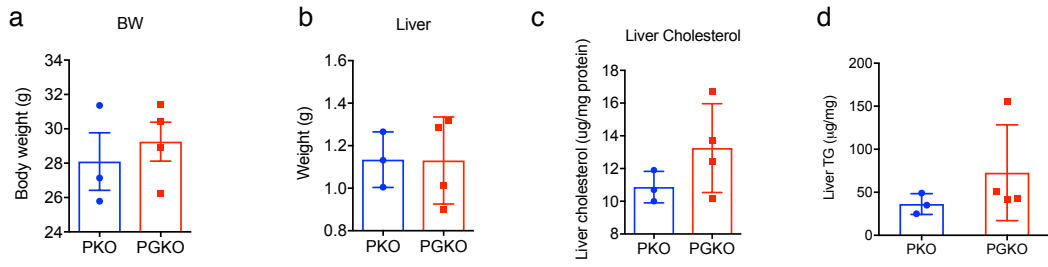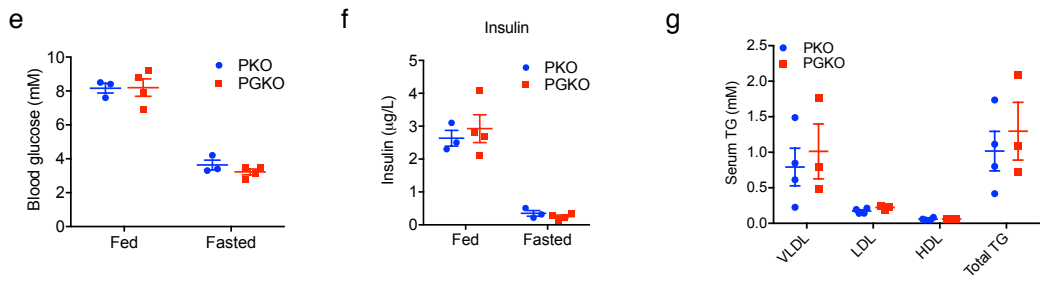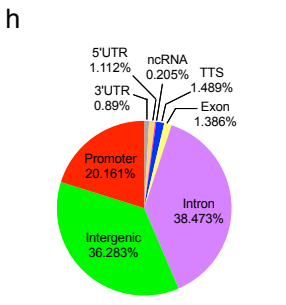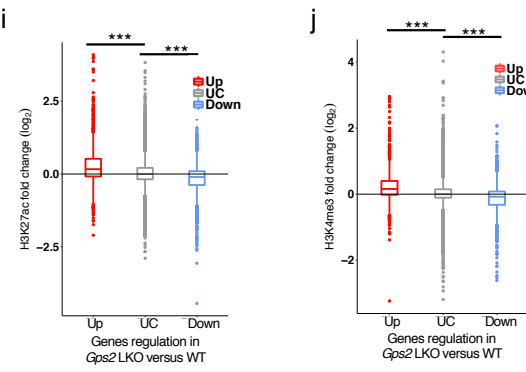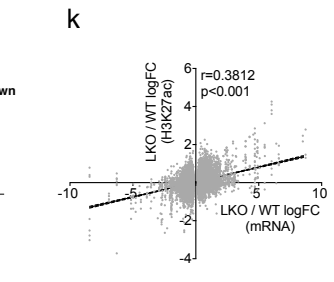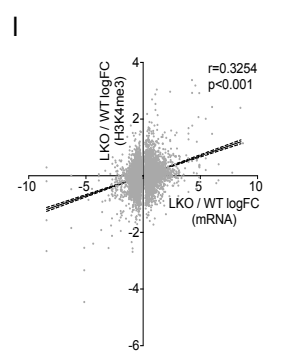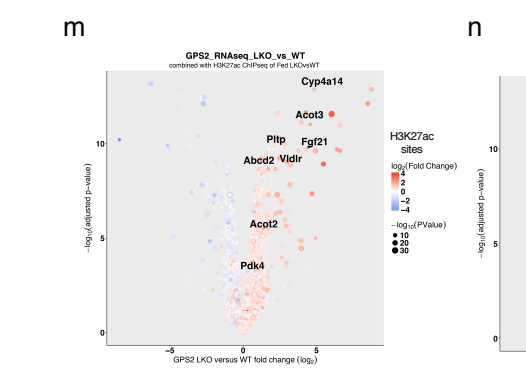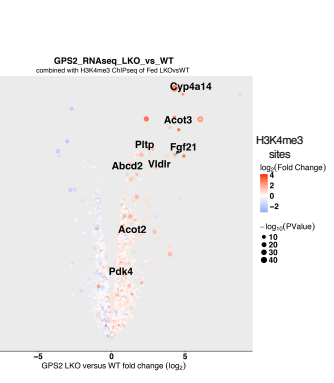



**Supplementary Figure 4: Further characterization of the GPS2-PPAR $\alpha$  relationship in mice.**

(a) Body weight; (b) liver weight; (c) 6 hour fasted liver cholesterol; (d) liver triglyceride; (e) fed and 12 hour fasted blood glucose; (f) insulin and (g) 6 hour fasted serum lipoprotein triglyceride in PKO and PGKO mice, PKO n = 3 and PGKO n = 4. (h) Global analysis of GPS2 peak distributions. Average logFC at (i) H3K27ac and (j) H3K4me3 sites in *Gps2* LKO versus WT of transcriptional (RNAseq) upregulated, downregulated and unchanged (UC) genes. (k-l) Global correlation analysis of mRNA logFC with (k) H3K27ac site logFC; and (l) H3K4me3 site logFC in LKO versus WT mice, nonparametric Spearman's test. (m-n) Volcano plot representing global gene expression along with logFC of (m) H3K27ac and (n) H3K4me3 sites (color from blue to red) and  $-\log(\text{P-value})$  (dot size) in LKO versus WT livers. Data are represented as mean  $\pm$  s.e.m. All the comparisons were done by two-tailed, non-parametric Mann-Whitney test. \*P < 0.05, \*\*P < 0.01, \*\*\*P < 0.001.

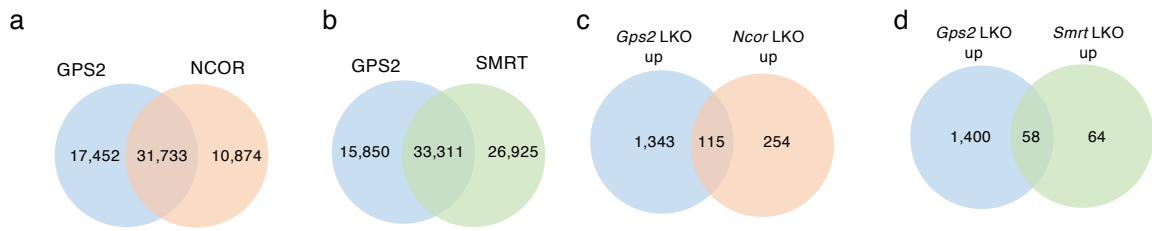

**e**

| Pathway                           | Gene | Statistics (adj. P value) |
|-----------------------------------|------|---------------------------|
| Metabolic pathways                | 23   | 5.78E-15                  |
| Retinol metabolism                | 10   | 1.04E-14                  |
| Drug metabolism - cytochrome P450 | 10   | 2.50E-14                  |
| PPAR signaling pathway            | 8    | 4.03E-11                  |

**f**

| Pathway                                   | Gene | Statistics (adj. P value) |
|-------------------------------------------|------|---------------------------|
| Prion diseases                            | 3    | 3.21E-05                  |
| Chagas disease (American trypanosomiasis) | 4    | 3.21E-05                  |
| Progesterone-mediated oocyte maturation   | 4    | 3.21E-05                  |
| Oocyte meiosis                            | 4    | 3.21E-05                  |

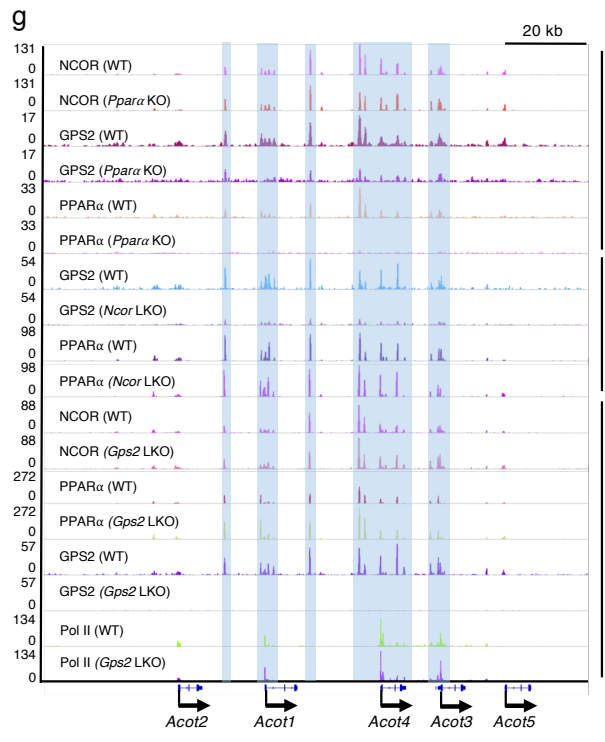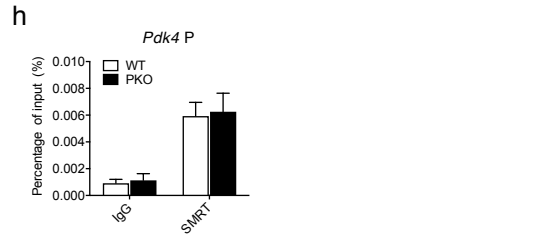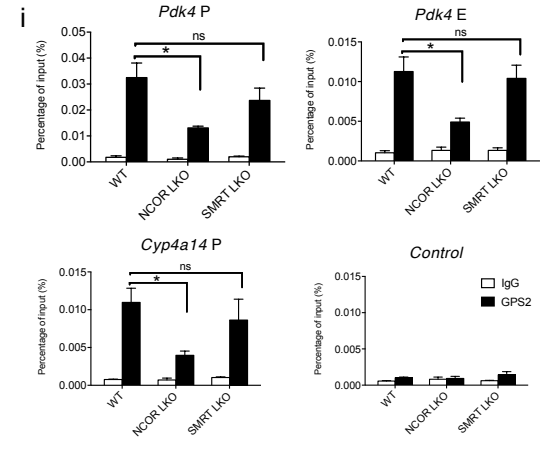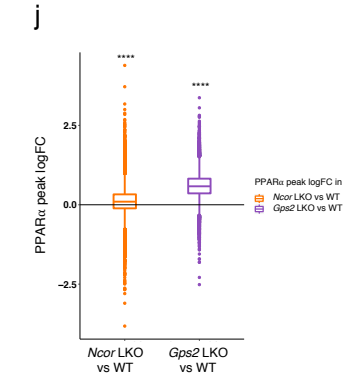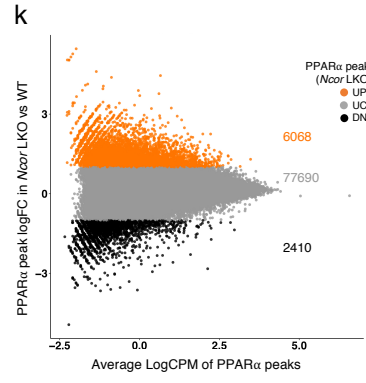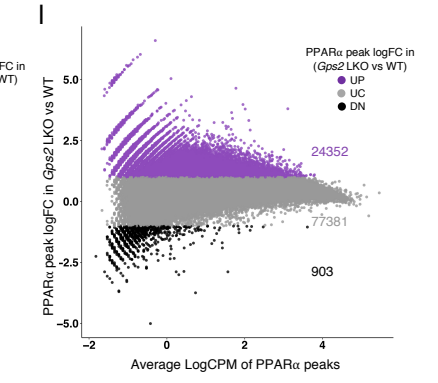

**Supplementary Figure 5: Comparative analysis of GPS2, NCOR and SMRT transcriptome and cistrome.**

(a-b) Comparative analysis of GPS2, (a) NCOR or (b) SMRT binding sites in mouse liver. (c-d) Comparative analysis of *Gps2* and (c) *Ncor* LKO and (d) *Smrt* LKO transcriptome data. (e-f) KEGG analysis of (e) GPS2/NCOR; and (f) GPS2/SMRT coregulated genes. (g) ChIP/seq tracks representing NCOR, GPS2, PPAR $\alpha$  recruitment in *Ppara*, *Ncor*, *Gps2* KO and respective WT livers in *Acot1-5* loci. (h) ChIP qPCR analysis of SMRT recruitment in WT and PKO livers, non-parametric Mann-Whitney test. (i) ChIP qPCR analysis of GPS2 recruitment in WT, *Ncor* and *Smrt* KO livers in *Pdk4* promoter (upper left), enhancer (upper right), *Cyp4a14* promoter (lower left) and control regions (lower right), WT n = 6, *Ncor* KO n = 3 and *Smrt* KO n = 3. (j) Box plot representing average logFC of PPAR $\alpha$  peaks in *Ncor* LKO and *Gps2* LKO versus WT livers, n = 3 in each group. (k-l) Smear plot of average logFC of PPAR $\alpha$  peaks in (k) *Ncor* LKO versus WT; and (l) *Gps2* LKO versus WT livers, against average logCPM, n = 3 in each group. One-way ANOVA, followed by Tukey's test. All data are represented as mean  $\pm$  s.e.m. \*P < 0.05, \*\*P < 0.01, \*\*\*P < 0.001.

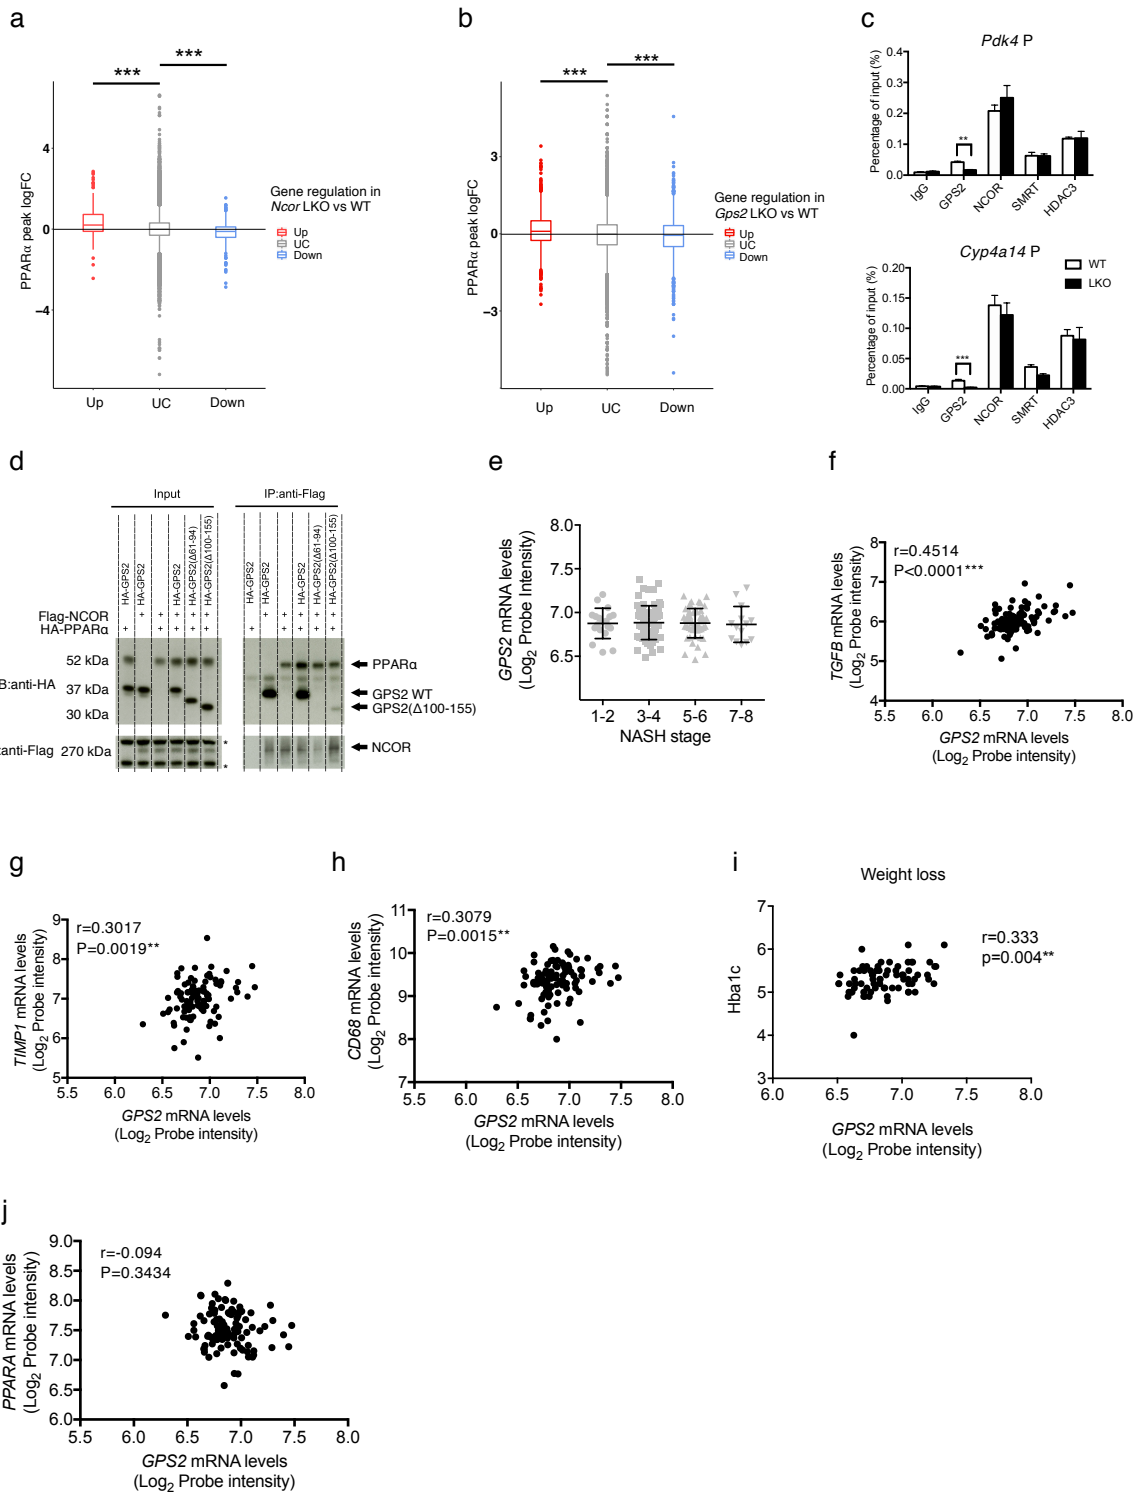

**Supplementary Figure 6: *GPS2* mRNA correlation analysis in NASH and fibrosis human livers.**

(a-b) Average logFC of PPAR $\alpha$  recruitment in (a) *Ncor* LKO versus WT at NCOR regulated genes (up- or down-regulated in *Ncor* LKO versus WT mice); and (b) *Gps2* LKO versus WT at GPS2 regulated genes (up- or down-regulated in *Gps2* LKO versus WT mice). One-way ANOVA followed by Tukey's test. (c) CHIP qPCR analysis of GPS2, NCOR, SMRT and HDAC3 recruitment in *Pdk4* (upper panel) and *Cyp4a14* (lower panel) promoters in WT and LKO mice livers, WT n = 4-12 and LKO n = 4-10, non-parametric Mann-Whitney test. (d) Co-immunoprecipitation of PPAR $\alpha$  with NCOR in WT or  $\Delta$ 61-94 and  $\Delta$ 100-155 truncated GPS2 co-transfected 293 cells (\* represents non-specific bands). (e) Liver expression of GPS2 in different NASH stages in human NASH dataset (GSE83452), n = 104, one-way ANOVA followed by Tukey's test. (f-j) Correlative analysis of *GPS2* with (f) *TGFB*, (g) *TIMP1*, (h) *CD68* and (i) HbA1c in human NASH liver dataset (GSE83452), n = 104, non-parametric Spearman's test. (j) Correlation of GPS2 with *PPARA* in human NAFLD liver samples (GSE83452), n = 104, non-parametric Spearman's test \*P < 0.05, \*\*P < 0.01, \*\*\*P < 0.001.

| Gene                  | Forward (5'-3')          | Reverse (5'-3')          |
|-----------------------|--------------------------|--------------------------|
| <i>36b4</i>           | ACTGGTCTAGGACCCGAGAAG    | TCCCACCTTGTCTCCAGTCT     |
| <i>Abca1</i>          | CCCAGAGCAAAAAGCGACTC     | GGTCATCATCACTTTGGTCCTTG  |
| <i>Abcd2</i>          | CATTATCACTGCAACGGGCTTT   | TCCGATCGCTAACCATAGCCT    |
| <i>Abcg1</i>          | CAAGACCCTTTTGAAAGGGATCTC | GCCAGAATATTCATGAGTGTGGAC |
| <i>Abcg5</i>          | CCTGCTGAGGCGAGTAACAA     | GGACGCGGAGAAGGTAGAAA     |
| <i>Abcg8</i>          | CCTGTGGATAGTGCCTGCAT     | GGAGAAGGTGAAGTTGCCGA     |
| <i>Acot2</i>          | AGTGCCTATGAAGGACTGAGGA   | GGCAGAAAGCACCTTTACCA     |
| <i>Acot3</i>          | CAGTCACCCTCAGGTAACAGG    | AAGTTTCCGCCGATGTTGGA     |
| <i>Apoa4</i>          | GGCCAATGTGGTGTGGGATT     | TTGTCCTGGAAGAGGGTACTGA   |
| <i>aSma</i>           | CAGTCGCTGTCAGGAACCCT     | GATGGATGGGAAAACAGCCCT    |
| <i>Ccl2</i>           | CAGATGCAGTTAACGCCCA      | TGAGCTTGGTGACAAAACTACAG  |
| <i>Ccl7</i>           | GATCTCTGCCACGCTTCTGT     | TGTCTTGAAGATAACAGCTTCCCA |
| <i>Coll1a1</i>        | CACCCTCAAGAGCCTGAGTC     | TCGATCCAGTACTCTCCGCT     |
| <i>Coll1a2</i>        | AGGAAAGAGAGGGTCTCCCG     | GCCAGGAGGACCCATTACAC     |
| <i>Col3a1</i>         | GTCCAGGGATACGGGGTATG     | CAGGGAAACCCATGACACCA     |
| <i>Ctgf</i>           | AGAACTGTGTACGGAGCGTG     | GTGCACCATCTTTGGCAGTG     |
| <i>Cyp4a10</i>        | GAACTTCCCAAGTGCCTTTCC    | CCTTTGGATCTGATCGCCCC     |
| <i>Cyp4a14</i>        | TCGGGGAGCAATATACGAGTCC   | GGAGCAAACCATAACCAATCCAG  |
| <i>Cyp7a1</i>         | GGTCTGCCTGGAAAGCACTA     | AGCATCGAAGATTTCCGGGT     |
| <i>Cyp8b1</i>         | TTGCAAATGCTGCCTCAACC     | TAACAGTCGCACACATGGCT     |
| <i>Fasn</i>           | TGGGTGTGGAAGTTCGTCAG     | CTGTCTGTCAGTAGCCGAG      |
| <i>Fgf21</i>          | CTACCAAGCATA CCCATCC     | GCCTACCACTGTTCCATCCT     |
| <i>Gps2</i>           | GAAGCACCAGCTTTTCTTGCAGC  | GCACTTGTGGTCCAAACATCTGC  |
| <i>Hdac3</i>          | TACAGCAGGCCAGAAGCACCCA   | TGGGGAAACCATACTTTCTTCCCA |
| <i>Il1b</i>           | AAATACCTGTGGCCTTGGGC     | CTTGGGATCCACACTCTCCAG    |
| <i>Il6</i>            | GCTGGAGTCACAGAAGGAGTGGC  | TCTGACCACAGTGAGGAATGTCCA |
| <i>Lepr</i>           | CGCCAGCTAGGTGTAAACTGG    | GAAGGGTTCTTAGGTAATGGC    |
| <i>Ncor</i>           | TGGATCCTGCTGCTGCTTACCT   | GGCTGCTCTCGTGGGACAGT     |
| <i>Pdk4</i>           | GATTGACATCCTGCCTGACC     | CATGGAACTCCACCAAATCC     |
| <i>Pltp</i>           | ACTACTAAGCTTGGTCGCCAT    | CCTGCTTACCAGATCCAGA      |
| <i>Ppara</i>          | AATGCAATTCGCTTTGGAAG     | GGCCTTGACCTTGTTTCATGT    |
| <i>Scd1</i>           | CAGGTTTCCAAGCGCAGTTC     | ACTGGAGATCTCTTGGAGCA     |
| <i>Smrt</i>           | GCCCTTAGTCCTAGGTGTGG     | TTGTACAGAGGCGTGTGGGA     |
| <i>Srebf</i>          | GCTTCTCTGGGCTCCTCTCT     | TGGCTCCTCTTTGATTCCAG     |
| <i>Tbl1</i>           | CGGCGAGGGTGGTCTGACTT     | CCAGAAAGTTCACCTCGTCGCTGG |
| <i>Tblr1</i>          | TGCCGCCACTAACCAGCAAGG    | CATGGCCCCGAAGCACAACCG    |
| <i>Tgfb1</i>          | GTCAGTGGAGTTGTACGGCA     | GGGCTGATCCCGTTGATTTT     |
| <i>Timp1</i>          | CAGATACCATGATGGCCCCC     | CCCTTATGACCAGGTCCGAG     |
| <i>Tnfa</i>           | AGCCCACGTCGTAGCAAACC     | GAGGAGCACGTAGTCGGGGC     |
| ChIP Control          | GTACCACAGCCTGCACGTAA     | ACTGTGCAGCATACCAGTGA     |
| ChIP <i>Cyp4a14</i> P | CCATTTCTTGGGACAGGTCA     | CGCCAAAGCTTTTCCACTA      |
| ChIP <i>Fgf21</i> P   | GGCTTCAGTGTCTTGGTCGT     | GTCTTCTGCTGGGGGTCTA      |
| ChIP <i>Pdk4</i> E    | TACCACCTTGCTTTCCCAAG     | CTTCCCCATGTTGACTGAGC     |
| ChIP <i>Pdk4</i> P    | GCCACACCAATCAGCTCAGA     | GAAACCGTGTCCGGGATCACT    |

**Supplementary Table 1:** Primers for qPCR and ChIP qPCR.

**GPS2 correlated gene list:**

|         |            |         |         |          |       |
|---------|------------|---------|---------|----------|-------|
| PRELP   | JUNB       | LAPTM5  | BSG     | CYP1A1   | MYO1F |
| TIMP1   | DHCR7      | VIM     | B2M     | ABCD3    | NCF2  |
| CTSD    | ITGAX      | CD68    | N4BP2L1 | ZFP1     | ACLY  |
| TPP1    | IL2RG      | UBD     | GMFG    | TTC36    |       |
| GRN     | CCL21      | JUNB    | ASPN    | PIIB     |       |
| KCNN2   | DTNA       | ALOX5AP | CD53    | CCND1    |       |
| IGFBP5  | FAT1       | IGFBP7  | IL18    | S1PR1    |       |
| PRAS    | FLNA       | AVP     | GLIPR1  | SERPINA4 |       |
| IFITM2  | UCP2       | FBLN5   | WIP1    | GRR65    |       |
| HSPB1.2 | HLA.DQA1.2 | TGFB1   | PDGFRA  | SCPEP1   |       |
| TTYH3   | HLA.DQA1.3 | PTGIS   | TMSB4X  | ME1      |       |
| SCD     | ACTA2      | SULF2   | MTHFD2L | KPNA2    |       |
| MMP2.1  | MGP        | LTBP4   | AASS    | TMSB10   |       |
| COL1A2  | KRT18      | HSPB1.1 | AOX1    | HLA.DRA  |       |

**Supplementary Table 2:** GPS2 correlated NASH gene list in human subjects.
